# Supplementary material for: Acupuncture modulates cortical thickness and functional connectivity in knee osteoarthritis patients
Source: PubMed Central journal article supplement — Sci Rep. 2014 Sep 26;4:6482. doi: 10.1038/srep06482 (PMC4175730; doi:10.1038/srep06482), 2014-09-26

## Acupuncture modulates cortical thickness and functional connectivity in knee osteoarthritis patients

Xiaoyan Chen, Rosa B Spaeth, Kallirroï Retzepe, Daniel Ott, Jian Kong\*

**Supplemental Figure 1.** Acupuncture Protocol **A)** Two 9-minute acupuncture treatment scan was acquired. (M=needle manipulation). **B)** Study design. **C)** Verum and sham acupuncture points. Low dose acupuncture points: ST35 and Xi yan; high dose acupuncture points include low dose acupoints and GB34, SP9, GB39 and SP6 (The figure was prepared by JK).

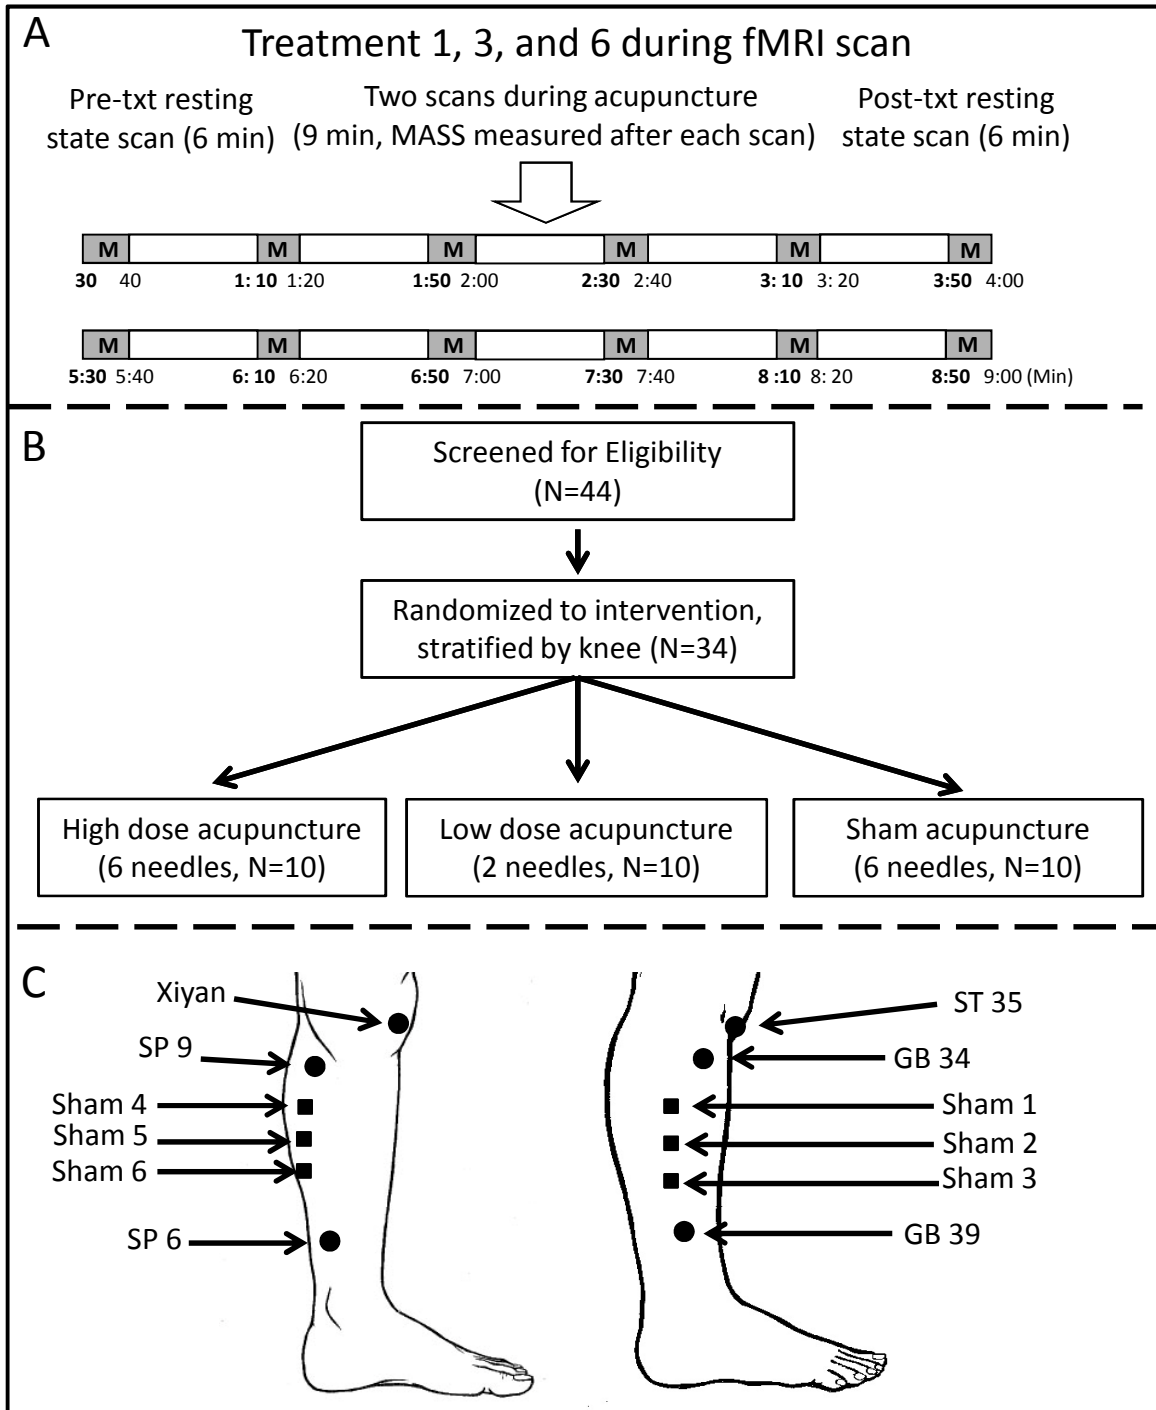

Supplement: srep06482-s1.pdf [file srep06482-s1.pdf]
